# Supplementary material
Source: Springer Nature journal article supplement (https://www.springermedizin.de/resource/supplementary/12943_2010_904_MOESM10_ESM.pdf/9551960)

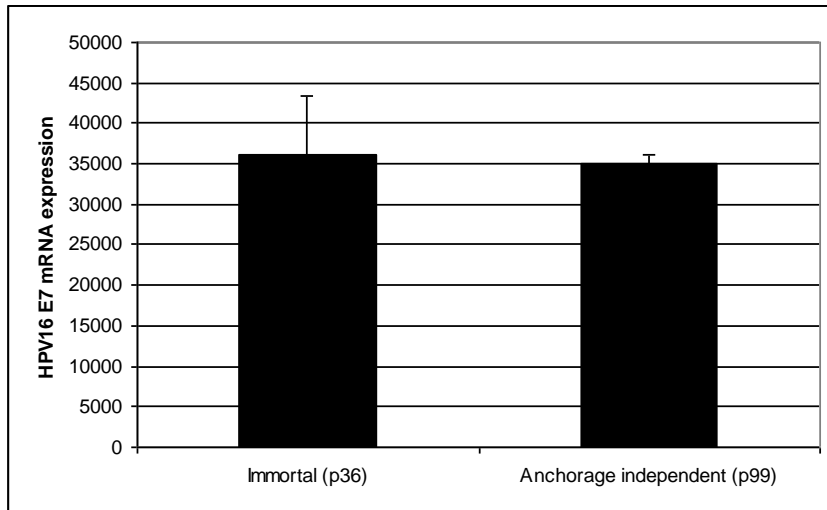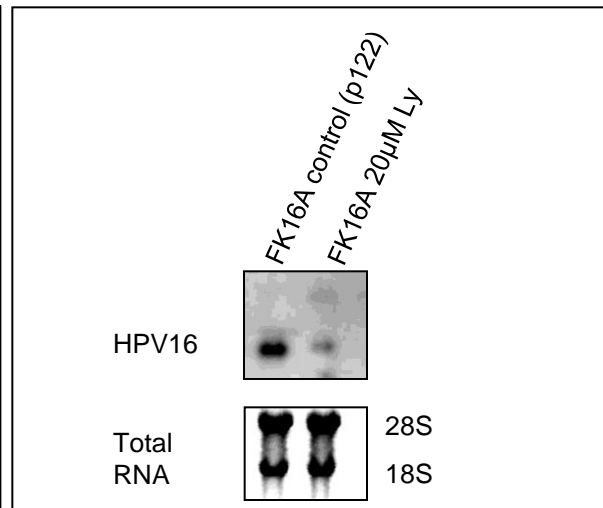

A

B

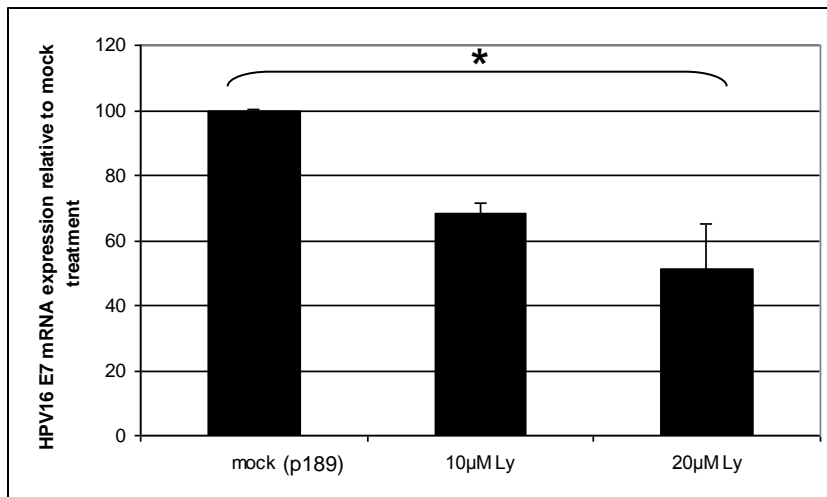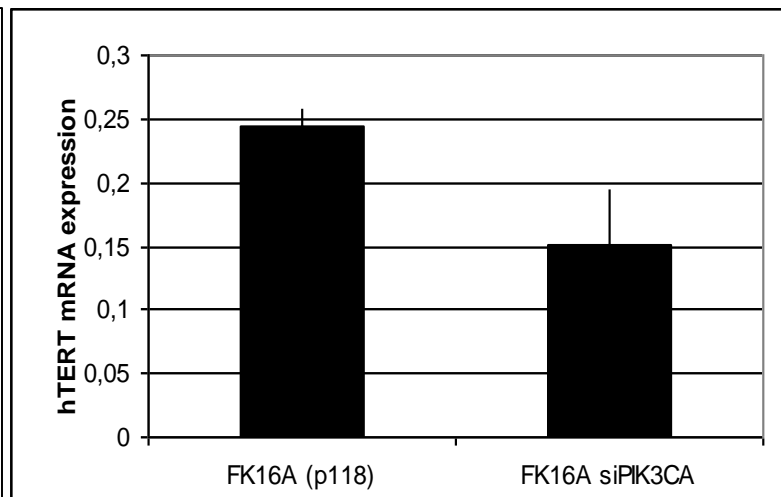

C

D

Supplement: MOESM10 [file 9551960]
